# Supplementary material
Source: PubMed Central journal article supplement (PMC3690318)
Supplement: NIHMS461689-supplement-Suppl_1.pdf [file NIHMS461689-supplement-Suppl_1.pdf]

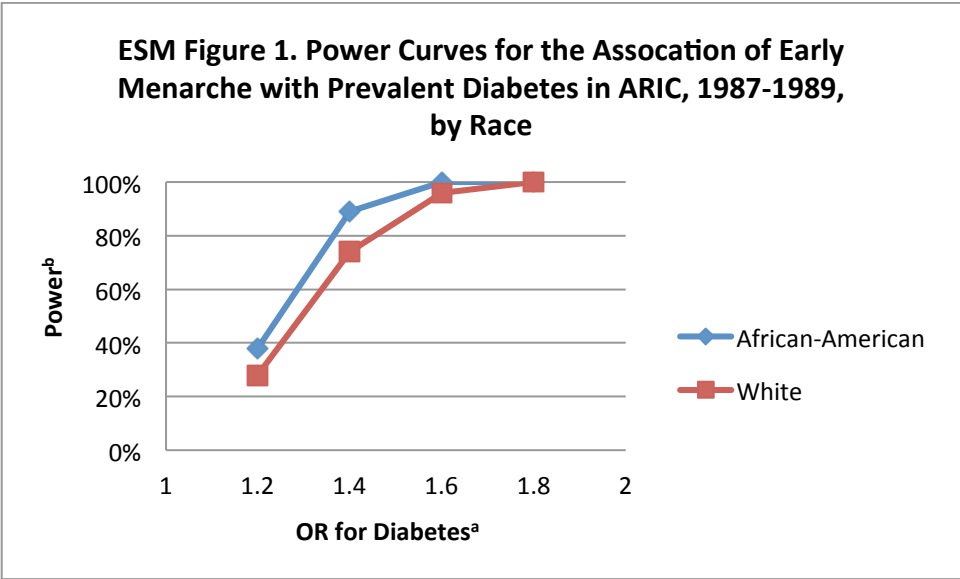

<sup>a</sup>ORs represent the odds of type 2 diabetes for women reporting menarche at age 8-11 years versus 13 years.

<sup>b</sup>Power calculations assume alpha=0.05. Sample sizes for African-American women: menarche age 8-11 years, n=444; menarche age 13, n=671. Sample sizes for white women: menarche age 8-11, n=1,033; menarche age 13, n=1,725.
