# Supplementary material
Source: PubMed Central journal article supplement (PMC3690318)
Supplement: NIHMS461689-supplement-Suppl_2.pdf [file NIHMS461689-supplement-Suppl_2.pdf]

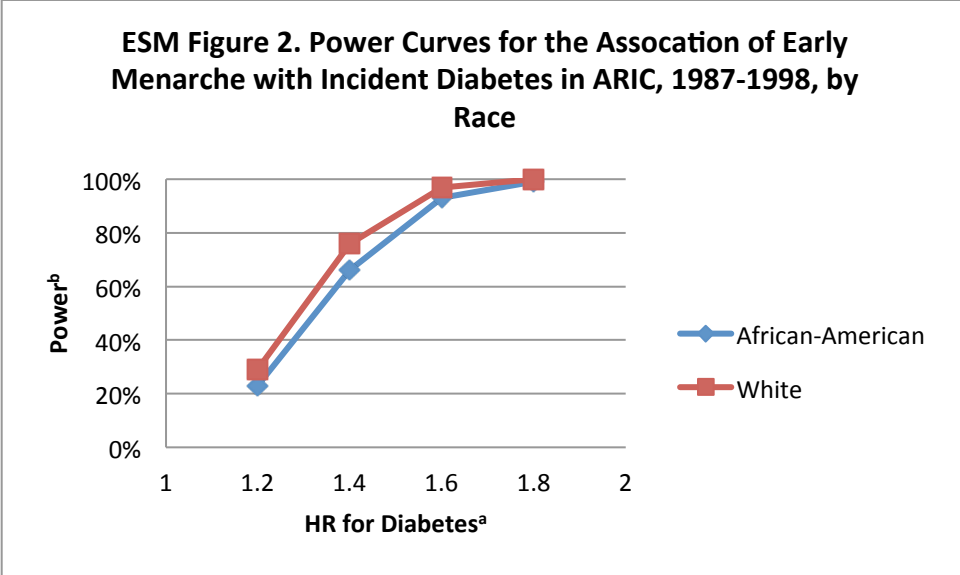

<sup>a</sup>HRs represent the risk of type 2 diabetes for women reporting menarche at age 8-11 years versus 13 years over 9 years of follow-up.

<sup>b</sup>Power calculations assume alpha=0.05. Sample sizes for African-American women: menarche age 8-11 years, n=343; menarche age 13, n=527. Sample sizes for white women: menarche age 8-11, n=916; menarche age 13, n=1,601.
